# Supplementary material for: Analysis of cell-free DNA in a consecutive series of 13,607 routine cases for the detection of fetal chromosomal aneuploidies in a single center in Germany
Source: PubMed Central journal article supplement (PMC8087552; doi:10.1007/s00404-020-05856-0), 2020-11-05
Supplement: 404_2020_5856_MOESM2_ESM.pdf [file 404_2020_5856_MOESM2_ESM.pdf]

## SUPPLEMENTARY TABLES

**Article Title:** Analysis of cell-free DNA in a consecutive series of 13,607 routine cases for the detection of fetal chromosomal aneuploidies in a single center in Germany

**Journal Name:** Archives of Gynecology and Obstetrics

**Author Names:** Heike Borth<sup>1</sup>, Anna Teubert<sup>2</sup>, Ralf Glaubitz<sup>2</sup>, Sarah Knippenberg<sup>2</sup>, Nargül Kutur<sup>1</sup>, Thomas Winkler<sup>1</sup>, Bernd Eiben<sup>1\*</sup>

**Author Affiliations:**

<sup>1</sup>amedes Institut für Labormedizin und Klinische Genetik Rhein/Ruhr, Essen, Germany

<sup>2</sup>amedes genetics, Georgstr. 50, D-30159 Hannover, Germany

**Corresponding Author:**\*Bernd Eiben, [eiben@eurogen.de](mailto:eiben@eurogen.de)

**Supplementary Table 1.** Clinical follow-up results for low-risk and high-risk cases.

|                        | Outcome results based on clinical follow-up |            |            |            |                 |            |       |
|------------------------|---------------------------------------------|------------|------------|------------|-----------------|------------|-------|
|                        | No aneuploidy detected                      | Trisomy 21 | Trisomy 18 | Trisomy 13 | Trisomy 21 + 13 | Monosomy X | Total |
| Invasive diagnostics   | 30                                          | 84         | 16         | 8          | 1               | 4          | 143   |
| Amniocentesis          | 20                                          | 61         | 11         | 8          | 1               | 3          | 104   |
| CVS                    | 5                                           | 16         | 4          | 0          | 0               | 0          | 25    |
| Amniocentesis + CVS    | 0                                           | 2          | 0          | 0          | 0               | 0          | 2     |
| Unknown*               | 5                                           | 4          | 1          | 0          | 0               | 1          | 11    |
| Postnatal cytogenetics | 0                                           | 1          | 0          | 0          | 0               | 0          | 1     |
| Ultrasound             | 5                                           | 5          | 3          | 1          | 0               | 0          | 14    |
| New-born physical exam | 2,464                                       | 1          | 0          | 0          | 0               | 1          | 2,466 |
| <b>Total Cases</b>     | 2,499                                       | 90         | 19         | 9          | 1               | 5          | 2,623 |

CVS, chorionic villus sampling

\*No information about the type of invasive prenatal diagnostic procedure

**Supplementary Table 2.** Relationship between NIPT results and LLR scores/T-Statistics

values.

| NIPT Result   | True Positives |                       | False Positives |                       |
|---------------|----------------|-----------------------|-----------------|-----------------------|
|               | LLR Score      | T-Statistics<br>Value | LLR Score       | T-Statistics<br>Value |
| Trisomy 21    | 151.8 ± 13.6   | 15.5 ± 0.7            | 27.3 ± 23.8     | 5.2 ± 2.1             |
| Trisomy 18    | 167.7 ± 43.5   | 16.2 ± 2.1            | 109.8 ± 66.9    | 13.7 ± 5.8            |
| Trisomy 13    | 125.2 ± 36.0   | 14.8 ± 2.7            | 73.5 ± 43.0     | 10.2 ± 3.7            |
| Trisomy 21+13 | N/a            | N/a                   | N/a             | N/a                   |
| Monosomy X    | 25.1 ± 8.5     | -18.0 ± 2.7           | 27.4 ± 4.3      | -17.4 ± 1.5           |
| All           | 147.1 ± 12.3   | 14.2 ± 0.9            | 54.9 ± 18.4     | 3.0 ± 2.9             |

N/a, not available
